# Supplementary material
Source: Elsevier journal article supplement (https://comptes-rendus.academie-sciences.fr/physique/article/10.1016/j.crhy.2017.11.001/file/attach/mmc1.pdf)
Supplement: mmc1 [file mmc1.pdf]

Special issue of the C.R. Physique  
Science in the making  
The *Comptes rendus de l'Académie des sciences* throughout history (1835–1966)  
La science en mouvement  
*Les Comptes rendus de l'Académie des sciences* à travers l'histoire (1835–1966)

**La découverte du neutron et ses conséquences (1930–1940)**  
*The discovery of the neutron and its consequences (1930–1940)*

Valery Nesvizhevsky, Jacques Villain\*  
*Institut Laue-Langevin, 71, avenue des Martyrs, 38042 Grenoble, France*

**Résumé**

En 1930, Walther Bothe et Herbert Becker réalisèrent une expérience qui fut améliorée ensuite par Irène et Frédéric Joliot-Curie. Ces auteurs, cependant, n'interprétèrent pas correctement leurs résultats et crurent avoir observé des rayons  $\gamma$ , alors qu'ils avaient vu des neutrons. Après des vérifications expérimentales supplémentaires, James Chadwick donna l'interprétation correcte de ces expériences en 1932. Immédiatement, la nouvelle particule, le neutron, devint un acteur essentiel de la physique nucléaire et des particules élémentaires et changea complètement l'ensemble du paysage de recherche. Enrico Fermi et son groupe l'utilisèrent pour la radioactivité artificielle, en remplaçant par des neutrons les rayons utilisés initialement par les Joliot-Curie. Ils découvrirent également que les neutrons lents étaient plus efficaces que les neutrons rapides dans certaines réactions. Une propriété essentielle des neutrons est la fission nucléaire, découverte en 1938 par Otto Hahn, Fritz Straßmann, Lise Meitner et Otto Frisch après plusieurs interprétations erronées des résultats expérimentaux. Quand Joliot, Halban et Kowarski démontrèrent la possibilité d'une réaction en chaîne, le physique nucléaire acquit un intérêt militaire au moment précis où éclatait la deuxième guerre mondiale. Plus tard elle devint une source industrielle d'énergie, et permit aux neutrons de devenir un outil de recherche disponible dans de grands instruments. Les *Comptes rendus de l'Académie des sciences* furent dans la découverte du neutron et de la fission le partenaire de plusieurs autres revues dans un débat international animé.

**abstract**

In 1930, Walther Bothe and Herbert Becker performed an experiment, which was further improved by Irène and Frédéric Joliot-Curie. These authors, however, misinterpreted their results and believed to have observed  $\gamma$ -rays while they had seen neutrons. After additional experimental verifications, James Chadwick gave the correct interpretation of these experiments in 1932. Immediately, the new particle, the neutron, became an essential actor of nuclear and elementary particle physics, and completely changed the whole research landscape. Enrico Fermi and his group applied it to artificial radioactivity, substituting neutrons to  $\alpha$ -rays initially used by Joliot-Curies. They also discovered that slow neutrons were more efficient than fast ones in certain nuclear reactions. A crucial discovery of Otto Hahn, Fritz Straßmann, Lise Meitner, and Otto Frisch, after several misinterpretations of complicated experimental results, was nuclear fission. When Joliot, Halban, and Kowarski demonstrated the possibility of a chain reaction by neutron multiplication due to fission, nuclear physics became a military science, at the very moment when the Second World War was beginning. Later it led to nuclear power applications and use of neutrons as an important tool and object of scientific research at large-scale neutron facilities. The *Comptes rendus de l'Académie des sciences* were partner of a vivid international debate involving several other journals.

## 1. La découverte du neutron

En 1930, au Physikalisch-Technische Reichsanstalt, à Berlin-Charlottenburg, Walther Bothe et Herbert Becker montrèrent [1] que les atomes de béryllium, de bore, de fluor et de lithium, bombardés par les particules  $\alpha$  émises par le polonium, produisent un rayonnement de grand pouvoir pénétrant. Ils pensèrent qu'il s'agissait de rayons gamma, les plus pénétrants alors connus. Ils supposèrent que ces noyaux légers capturent les particules  $\alpha$ , et que les rayons  $\gamma$  contiennent l'excès d'énergie dégagée :

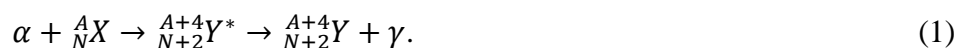

Un an plus tard, Irène Curie, en étudiant l'absorption de ce rayonnement secondaire de Be et Li, constata [2] qu'il pénètre à travers les matériaux encore plus facilement que prévu initialement par Bothe. Il traversait une couche de plomb trois fois plus épaisse que les rayons  $\gamma$  les plus pénétrants émis par les éléments radioactifs. Frédéric Joliot étudia un rayonnement émis par le bore, bombardé par les particules  $\alpha$  du Polonium [3], et arriva à une conclusion analogue. Pour expliquer cet effet, ils supposèrent tous les deux que les rayons  $\gamma$  émis possédaient une très haute énergie.

Deux ans plus tard, Irène et Frédéric Joliot-Curie observèrent [4], en mesurant l'ionisation produite par le rayonnement secondaire du bore et du béryllium dans une chambre avec une fenêtre mince en aluminium (Al) (voir Fig.1), que l'ionisation augmentait quand ils plaçaient une matière contenant de l'hydrogène (H) devant la fenêtre. L'effet semblait être dû à l'éjection de protons (ou "rayons H" comme on disait parfois alors) dont la vitesse pouvait atteindre près de 10% de la vitesse de la lumière. Les auteurs acceptèrent sans discussion l'hypothèse de Bothe selon laquelle radiation secondaire était faite de rayons  $\gamma$ . Une étude plus détaillée de leur interaction avec la matière révéla [5,6] des contradictions internes de l'hypothèse des rayons  $\gamma$ , et incita les auteurs à supposer même "un nouveau mode d'interaction du rayonnement avec la matière".

De l'autre côté de la Manche, au Laboratoire Cavendish à Cambridge, James Chadwick, qui pendant une décennie avait cherché le neutron (dont son patron Rutherford soupçonnait l'existence), eut une idée différente. Après avoir répété et amélioré les expériences, il publia, un mois plus tard, un article très court mais particulièrement clair [7], dans lequel il démontrait que, si l'on acceptait l'hypothèse des rayons gamma, les résultats expérimentaux étaient incompatibles avec la conservation de l'énergie et de la quantité de mouvement. Un de ses arguments était le suivant: si le béryllium émettait des rayons  $\gamma$ , alors la réaction observée serait:

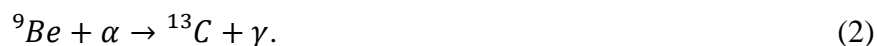

Chadwick observa que le défaut de masse de  ${}^{13}\text{C}$  est connu avec une précision suffisante pour qu'on puisse montrer que l'énergie du [photon] émis dans ce processus ne peut pas être supérieure à environ  $14.10^6$  volts. Il était difficile de rendre un tel quantum responsable des effets observés. Chadwick remarquait que les difficultés disparaissaient si l'on supposait que le rayonnement est constitué de particules de masse 1 et de charge 0, ou "neutrons". En effet, si la réaction est

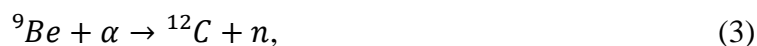

il reste beaucoup d'énergie pour le neutron (n).

Les Joliot-Curie ne furent pas tout de suite convaincus [8]. Ils firent des expériences supplémentaires, mais conclurent rapidement [9] qu'elle «apportait un nouveau support à l'hypothèse des neutrons». En particulier, ils envisagèrent une autre réaction nucléaire, produisant de l'azote à partir du bore :

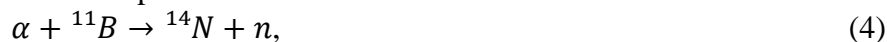

et constatèrent que, dans cette hypothèse, l'énergie maximale des neutrons correspondait à l'énergie expérimentalement mesurée des protons éjectés. De plus, l'émission d'électrons secondaires de haute énergie observée précédemment [8] était également cohérente avec l'hypothèse des neutrons.

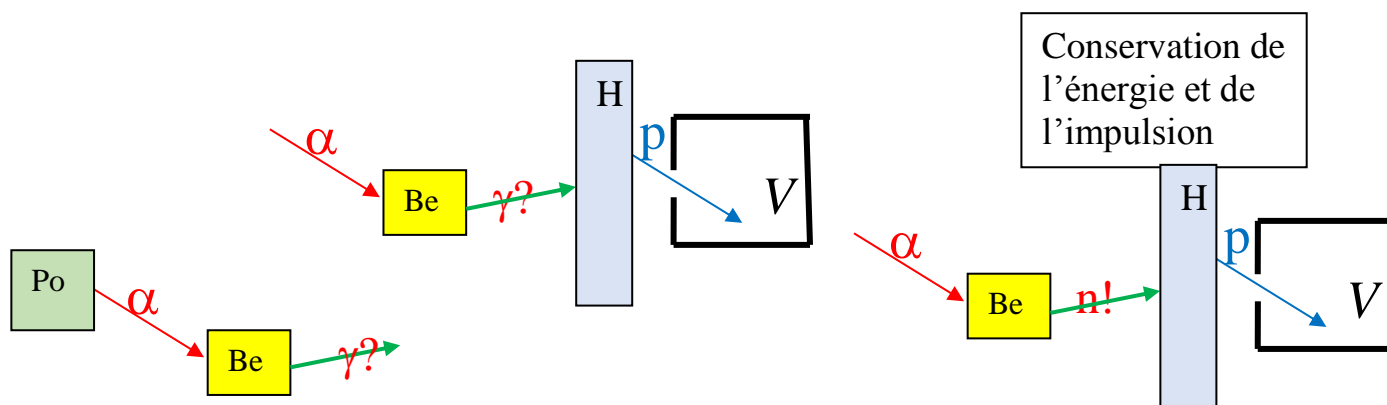

Fig.1.A gauche: L'expérience de Bothe. Le béryllium, bombardé par des particules  $\alpha$  (en rouge) de Po émet un rayonnement (en vert) de grande puissance pénétrante, que Bothe supposait être des rayons  $\gamma$ . Au milieu: l'expérience des Joliot-Curie. L'hydrogène, lorsqu'il est frappé par le rayonnement représenté en vert, émet des protons de haute énergie. A droite: l'expérience de Chadwick. Il analysa la conservation de l'énergie et de l'impulsion dans ces réactions nucléaires.

Ils ajoutèrent cependant que le rayonnement était complexe et que les rayons  $\gamma$  étaient présents ainsi que des neutrons. La même chose était notée par Pierre Auger [10]. Rapidement, les propriétés du nouveau rayonnement furent l'objet d'expériences publiées dans les Comptes rendus [11-17].

Il est à noter que l'interposition devant un détecteur de neutrons d'un matériau hydrogéné tel que le polyéthylène est de nos jours encore une méthode habituelle pour estimer rapidement l'énergie des neutrons. Cependant, la couche interposée est plus épaisse, de sorte que les neutrons ont le temps de se thermaliser, ce qui augmente leur interaction avec le détecteur. L'interprétation des premières expériences était complexe car la liste des inconnues était longue. Des neutrons, des rayons  $\gamma$  et des protons d'énergies différentes, avec des propriétés différentes, peuvent être produits simultanément, et les différents types de détecteurs utilisés dans les expériences de Bothe, des Joliot-Curie, et de Chadwick, ont une sensibilité différente par rapport aux différents types de rayonnement.

Irène et son mari, pas plus que Bothe, n'avaient pensé qu'ils pouvaient avoir observé des neutrons. Pourtant, même avant 1932, quelques chercheurs s'attendaient à en voir. Chadwick en était, mais il n'était pas le seul. L'écrivain Leonardo Sciascia rapporte que, quand Ettore

Majorana eut connaissance des expériences des Joliot-Curie, il dit à Segré et Amaldi : « Quels idiots, ils ont découverts le proton neutre et ils ne s'en sont pas aperçu ! »

A la suite de la découverte du neutron, une reformulation complète de la physique du noyau et des particules élémentaires fut entreprise par divers chercheurs. Ainsi, plusieurs chercheurs, dont James Chadwick [19], virent dans le neutron un constituant du noyau [20–22]. Dmitry Iwanenko [23,24] suggéra de voir le noyau atomique comme un assemblage de protons et de neutrons, et non plus de protons et d'électrons comme dans un précédent modèle proposé par Rutherford<sup>1</sup>, où figuraient des électrons “intra-nucléaires”. Des théories plus détaillées furent présentées par Werner Heisenberg [25–27] (presqu'en même temps qu'Iwanenko) puis, l'année suivante, Ettore Majorana [28] et Eugene Wigner [29,30]. La théorie du noyau atomique devenait beaucoup plus simple. L'interaction forte entre neutrons et protons assurait la stabilité du noyau. Heisenberg considérait le proton et le neutron comme deux états quantiques d'une même particule. Hideki Yukawa analysa l'interaction neutron-proton, proposa une forme de potentiel d'interaction et introduisit les mésons [31], ce qui était un pas décisif pour la physique des particules élémentaires.

Un fait expérimental donnait cependant lieu à controverse: le spectre d'énergie des électrons émis dans la désintégration  $\beta$ . Si la désintégration bêta d'un noyau produit, comme on croyait l'observer expérimentalement, une seule particule légère (un électron) alors la conservation de l'énergie implique que les électrons aient une énergie bien définie. Or l'énergie observée forme une bande large, de sorte que quelques physiciens (parmi lesquels Niels Bohr!) pensaient que l'énergie n'était peut-être pas conservée. L'explication la plus plausible, cependant, était l'émission simultanée d'une autre particule, déjà suggérée en 1930 par Wolfgang Pauli [32,33]. Un problème majeur était que cette particule n'avait pas été observée expérimentalement. Pourquoi? La seule explication possible était un pouvoir de pénétration très élevé qui permettrait à la particule hypothétique de passer au travers de tous les écrans sans laisser de trace. Comme cela semblait peu croyable, Pauli présentait son hypothèse sur le ton de la plaisanterie, dans une lettre adressée à «Liebe radioaktive Damen und Herren» dans laquelle il écrivait qu'il préférerait ne rien publier pour l'instant sur la particule hypothétique. Néanmoins, de plus en plus de physiciens croyaient que la blague de Pauli était une chose sérieuse. Par exemple, en décembre 1933, Francis Perrin analysa les données sur la désintégration  $\beta$  et suggéra [34] que la nouvelle particule (qui possède maintenant son nom moderne de neutrino) devrait avoir une masse beaucoup plus petite que la masse des électrons, et donc une vitesse proche à la vitesse de la lumière. Son spin devait être  $1/2$ , comme l'avait suggéré Wolfgang Pauli [32]. Le même mois, Enrico Fermi publia une courte note [35], rapidement suivie d'une théorie détaillée de la désintégration  $\beta$  [36]. La réaction y était identifiée comme la transformation d'un neutron (n) en un proton (p), un électron (e) et un antineutrino ( $\bar{\nu}$ ):

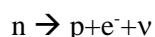

Comme l'écrit Amaldi [33], cette «relation n'est pas explicitement écrite dans l'article de Fermi, mais elle y est clairement exprimée par des mots». Fermi inventait l'interaction nucléaire faible. Le neutrino n'a été observé qu'en 1956 [37]. On croit maintenant qu'il a une masse non-nulle, mais extrêmement petite.

---

<sup>1</sup> Ernest Rutherford, *Nuclear Constitution of Atoms*, Proc. Roy. Soc. A 97 (1920) 374. Rutherford était bien conscient des défauts de son modèle (qui prétendait confiner l'électron dans un petit volume incompatible avec sa faible masse), et cette difficulté fut une motivation de la découverte de Chadwick. Le neutron était implicitement introduit dans cet article.

Jusqu'en 1930, on ne connaissait que deux interactions fondamentales (gravitationnelle et électromagnétique). Dans une très courte période après la découverte du neutron, deux nouvelles interactions fondamentales ont été découvertes, l'interaction forte qui lie les nucléons dans le noyau, et l'interaction faible responsable de la désintégration  $\beta$ . Les propriétés fondamentales du neutron lui-même furent également étudiées. Dès 1933, les Joliot-Curie [38] montrèrent que la masse des neutrons est plus grande que la masse des protons, contrairement ce qu'avait cru James Chadwick [19]. Cela a des conséquences importantes pour la stabilité nucléaire et les réactions nucléaires.

Quoique les neutrons forment plus de la moitié de la matière qui nous entoure, leur durée de vie à l'état libre est courte : environ 15 minutes. Il faut briser un noyau pour obtenir un neutron.

## 2. La radioactivité artificielle

En janvier 1934, Irène et Frédéric Joliot-Curie constatèrent que, lors de l'irradiation de certains éléments légers non radioactifs (B, Mg, Al) par des rayons  $\alpha$  du polonium, le matériau irradié émet des positrons et reste radioactif pendant un assez longtemps après l'exposition [39-41]. Ils conclurent qu'une nouvelle matière radioactive avait été produite artificiellement. On pouvait dès lors séparer un élément radioactif simplement en mesurant le rayonnement après chaque séparation chimique! La désintégration était suffisamment lente pour permettre la séparation chimique et l'identification [42], cependant assez rapide pour exiger des techniques de pointe pour effectuer l'analyse chimique, en particulier en raison des quantités mineures de matières radioactives produites.

L'Institut du radium à Paris possédait le plus gros stock de Polonium dans le monde, ce qui permettait d'obtenir un rayonnement  $\alpha$  d'intensité relativement élevée.

Par exemple, dans le cas de la transformation du noyau Al en un noyau de silicium (Si), les Joliot-Curie suggéraient que le phénomène se déroulait en deux étapes. D'abord la capture de la particule  $\alpha$  avec expulsion instantanée du neutron et formation d'un isotope radioactif du phosphore de masse atomique 30 (alors que l'atome de phosphore stable a une masse atomique de 31). Ensuite, ce nouveau radioélément, qu'ils appelaient "radio-phosphore", se décompose exponentiellement avec une demi-vie de trois minutes:

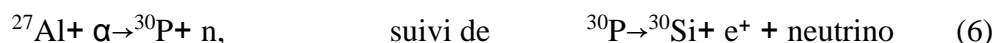

Ils interprétaient de manière analogue la production d'éléments radioactifs par bombardement du bore et du magnésium. Dans le cas du bore on obtenait un isotope instable de l'azote, avec une demi-vie de 11 minutes; dans le cas du magnésium on obtenait des isotopes instables de Si et Al. Ils suggéraient aussi que des éléments radioactifs pourraient être produits par bombardement par d'autres particules telles que protons, deutérons, neutrons [41].

Pour cette découverte de la synthèse des radioéléments [43], Irène et Frédéric reçurent le Prix Nobel de chimie [44,45] en 1935; la même année, Chadwick était lauréat du prix Nobel de physique.

Le neutron, inconnu deux ans plus tôt, était un produit de toutes ces réactions nucléaires. Mais pourrait-il être aussi un agent de la réaction? C'était l'idée d'Enrico Fermi à Rome: utiliser la nouvelle particule, au lieu des rayons  $\alpha$ , pour produire de nouveaux éléments radioactifs. Selon Emilio Segrè, Enrico Fermi vit tout de suite que le procédé pouvait être considérablement étendu en utilisant des neutrons comme projectiles [46]. En effet les

neutrons n'ont pas de barrière de potentiel nucléaire à surmonter pour pénétrer dans le noyau; de plus, leur section efficace d'interaction est grande. Un petit inconvénient était que les neutrons n'étaient pas produits spontanément mais Fermi et son groupe (Segré, Amaldi, Rasetti ...) purent par cette méthode obtenir plus de 20 nouveaux isotopes radioactifs [47]. Ces réactions nucléaires produites par des neutrons sont le principe de l'analyse par activation neutronique, méthode puissante et générale très employée aujourd'hui.

Irène et Frédéric répétèrent les expériences de Fermi et confirmèrent ses résultats [48] pour Ag, Si, Zn, I, Fe, obtenant notamment les mêmes valeurs des périodes de décroissance. De plus, ils vérifièrent que le même élément radioactif peut être obtenu en utilisant différentes réactions nucléaires, par exemple:

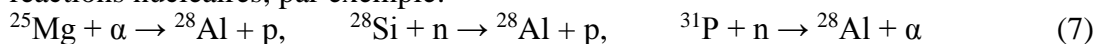

D'autres transmutations de différents types furent découvertes ; certaines produites par les rayons  $\alpha$ , par les rayons  $\gamma$ , d'autres par les protons ou les deutérons, d'autres par les neutrons. Les particules expulsées lorsque le noyau se désintègre sont des protons, des rayons  $\alpha$  ou des neutrons. En quelques années, les expérimentateurs disposèrent de quelques dizaines d'éléments radioactifs nouveaux préparés par cette méthode. Ces isotopes trouvèrent des applications importantes en tant que « traceurs » en physique, en chimie et en biologie. En médecine également, les traceurs radioactifs peuvent être administrés à un endroit particulier du corps humain et aider à traiter les maladies. Cette technique avait déjà été développée avec des éléments radioactifs naturels dès 1913 par Georg von Hevesy, qui reçut en 1943 le prix Nobel de chimie pour cette raison. La découverte de nouveaux éléments plus lourds, d'isotopes riches en neutrons et d'isotopes riches en protons se poursuit de nos jours . Aujourd'hui, l'élément le plus lourd est l'oganesson [49], de numéro atomique 118, dont le nom est un hommage à Yuri Oganessian, de Dubna.

En étudiant les réactions nucléaires induites par les neutrons, le groupe de Fermi fit une autre découverte importante [50]: Dans les expériences sur la radioactivité induite sur l'argent par des neutrons, on avait interposé un morceau de paraffine de quelques centimètres d'épaisseur entre la source et l'échantillon d'Ag. Alors que l'effet devrait diminuer, il augmente! La conclusion était claire: les neutrons lents ont un effet plus fort que les neutrons rapides. En particulier, la section efficace de l'absorption des neutrons par les noyaux augmente considérablement lorsque la vitesse des neutrons diminue.

Dans un autre article important [51], Fermi proposait un formalisme simple qui permettait de décrire l'interaction des neutrons lents avec la matière<sup>2</sup>. Il suffisait de remplacer l'interaction nucléaire forte  $U(\mathbf{r})$ , mal connue, par  $a\delta(\mathbf{r})$ , où  $\mathbf{r}$  est la distance neutron-noyau et  $a$  un paramètre numérique facile à déterminer expérimentalement. Ce *pseudopotentiel de Fermi*<sup>3</sup>

<sup>2</sup> L'article considérait l'interaction du neutron avec les « substances hydrogénées », mais s'applique en fait à n'importe quel matériau.

<sup>3</sup> Un pseudopotentiel est un potentiel fictif qui, si on l'introduit dans l'équation de Schrödinger à la place du potentiel vrai, permet d'obtenir les fonctions d'onde correctes dans la région physiquement intéressante. La notion de pseudopotentiel est essentiellement dû à Fermi (*Nuovo Cimento*, 11, 157, 1934). Le mot lui-même a été introduit une trentaine d'années plus tard. Les pseudopotentiels sont très utiles dans la théorie des électrons dans les solides. Cf W.A. Harrison W.A. *Pseudopotentials in the theory of metals* (Benjamin 1966) ou V. Heine, *The Pseudopotential Concept*, Solid State Physics, **24**, pp. 1–36, (Academic Press, 1970).

permet d'interpréter les expériences de diffraction des neutrons et aussi de concevoir des dispositifs d'optique neutronique<sup>4</sup>

Les neutrons lents se sont révélés importants dans un autre phénomène dont la découverte fut un événement majeur du milieu du XXe siècle: la fission.

### 3. La fission

Comme on le sait, l'histoire de la fission a commencé en 1938 avec des articles d'Otto Hahn et de Fritz Straßmann à Berlin [52,53]. Cependant, la préhistoire avait déjà commencé à Rome en mars 1934 lorsque les collègues de Fermi bombardèrent l'uranium et le thorium avec des neutrons. Ils obtinrent des résultats compliqués, dont l'interprétation était difficile. Il est maintenant évident qu'ils avaient produit la fission du noyau, c'est-à-dire la division du noyau lourd en deux fragments de masses plus faibles. Mais c'est la formation d'éléments transuraniens, c'est-à-dire avec un nombre atomique supérieur à 92, que Fermi, à vrai dire très prudemment, annonça [54,55]. C'était logique car les noyaux légers qu'il avait auparavant bombardé avec des neutrons avaient donné naissance à des noyaux plus lourds. L'irradiation de l'uranium par des neutrons devait donc conduire à la formation de noyaux transuraniens. L'article de Fermi, cependant, fut critiqué par une chimiste allemande, Ida Noddack, connue pour avoir découvert le rhénium. "Il est également concevable", écrivait-elle dans [56], « que lorsque des noyaux lourds sont bombardés de neutrons, ces noyaux puissent se décomposer en plusieurs fragments assez importants, qui sont certainement des isotopes d'éléments connus, mais pas voisins des éléments irradiés ». Cependant, Frau Noddack ne tenta pas de vérifier son hypothèse, ne proposa pas de base théorique pour ce processus, et sa suggestion fut donc oubliée jusqu'en 1938.

Lise Meitner, Otto Hahn, Fritz Straßmann en Allemagne et Irène Curie en France effectuèrent des expériences semblables à celles de Fermi, dans le même but de produire et d'étudier de nouveaux noyaux transuraniens [57-60]. L'étude des radioéléments résultant de l'irradiation de U et de Th avec des neutrons lents et rapides était particulièrement compliquée en raison de nombreux noyaux / isotopes / isomères produits ainsi que de la similitude des propriétés chimiques des séries d'éléments correspondants dans le tableau périodique. Avec l'accumulation de nouvelles données, les contradictions internes de l'interprétation devenaient plus évidentes, sans toutefois indiquer clairement l'origine du puzzle. En particulier, les propriétés chimiques de certains noyaux produits étaient différentes des propriétés de n'importe quel noyau avec un nombre atomique proche de celui de U ou de Th, le nombre d'isomères à supposer pour expliquer les données étant trop important.

Les choses changèrent lorsque Hahn et Straßmann identifièrent le baryum [52,53] dans les produits de la réaction. Le noyau de baryum le plus courant a la masse 138. Pouvait-on imaginer que le noyau d'uranium, de masse 238, se soit cassé en deux morceaux ? Et ce sous l'effet d'un tout petit neutron ? Les deux chimistes ne pouvaient y croire, d'autant plus que de nombreux éminents scientifiques ne juraient que par le processus inverse: la formation d'éléments transuraniens. Hahn était un chimiste nucléaire et avait besoin de l'aide d'un physicien. Dans plusieurs lettres, Hahn exposa ses derniers résultats et ses préoccupations à sa collègue Lise Meitner: «Il y a quelque chose au sujet des isotopes du radium que pour

---

<sup>4</sup> H. MAIER-LEIBNITZ, T. SPRINGER, *THE USE OF NEUTRON OPTICAL DEVICES ON BEAM-HOLE EXPERIMENTS* Reactor Science and Technology (Journal of Nuclear Energy Parts A/B). Vol. 17. pp. 217 to 225 (1963)

l'instant nous ne disons qu'à toi. ... Nos isotopes du radium ne se comportent pas comme du radium, mais comme du baryum. [...] Peut-être peux-tu proposer quelque merveilleuse explication. Nous savons bien que [le noyau d'uranium] ne peut pas exploser en Ba. .. »

Lise Meitner et son neveu Otto Robert Frisch trouvèrent vite l'explication demandée : la fission nucléaire [61], nommée par Frisch par analogie avec la fission biologique des cellules vivantes. Ils envisageaient une réaction nucléaire telle que

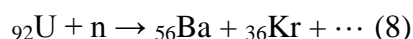

où les points (...) représentent des photons gamma et un nombre de neutrons qui dépend des nombres de masse des trois noyaux. Inspirés par un article de Niels Bohr et Fritz Kalckar [62], ils décrivaient le processus de fission en se basant sur le modèle nucléaire de la goutte d'eau imaginé par George Gamow : « En raison de leur empilement compact et de la force de l'interaction, on s'attend à ce que les particules d'un noyau lourd se comportent d'une manière collective qui ressemble un peu au mouvement d'une goutte de liquide », écrivaient Meitner et Frisch. Lors de l'absorption d'un neutron, la goutte constituée par le noyau U s'allonge (Fig.2). Ce mouvement est contrecarré par la tension superficielle, mais, selon Meitner et Frisch, « la tension de surface d'une gouttelette chargée est diminuée par sa charge, et une estimation approximative montre que la tension superficielle des noyaux, diminuant avec la charge nucléaire croissante, peut devenir nulle pour des nombres atomiques de l'ordre de 100. » Ainsi, la goutte peut se diviser en deux gouttes plus petites, qui s'écartent en raison de leur répulsion électrique et gagnent une énergie cinétique d'environ 200 MeV. L'énergie de liaison nucléaire libérée est également d'environ 200 MeV et la masse des fragments est plus petite que la masse d'uranium initiale, conformément à la formule d'Einstein  $E = mc^2$ . Otto Frisch [63], et d'autres auteurs [64-68] observèrent expérimentalement le grand pouvoir ionisant des fragments de fission nucléaire.

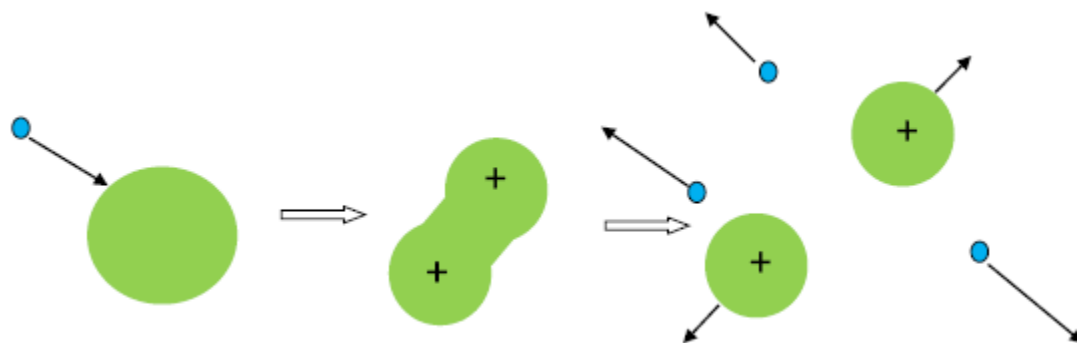

Figure 2. La fission nucléaire dans le modèle de la goutte liquide. Quand un noyau (en vert) est heurté par un neutron (en bleu) il s'allonge et se sépare en deux morceaux sous l'effet de la répulsion électrostatique, avec émission de plusieurs neutrons.

Les articles de Hahn et Straßmann, et de Meitner et Frisch, furent publiés très rapidement après avoir été écrits et soumis hâtivement. Par exemple, il n'est pas tout à fait exact de dire que la «tension superficielle est diminuée par la charge». La tension de surface et la répulsion de Coulomb sont plutôt des effets antagonistes, et le dernier gagne dans les noyaux lourds. De plus, l'énergie cinétique pourrait être significativement inférieure à 200 MeV (disons 180 MeV) en raison de l'énergie d'excitation des fragments de fission.

La recherche sur la fission se répandit à travers le monde. De nouveaux chercheurs firent leur apparition. Ceux qui travaillaient sur la production de noyaux transuraniens durent réviser leurs résultats précédents. Irène, avec son coauteur Paul Savitch, a expliqué ses hésitations [69]: "Nous avons envisagé la possibilité d'une rupture de l'atome d'uranium, mais nous avons rejeté cette idée [...]", en fait parce que Hahn, Meitner et Straßmann avaient, dans des articles antérieurs, mal interprété leurs résultats expérimentaux et annoncé la formation d'éléments transuraniens - la même erreur que celle de Fermi en 1934 [70]. En fait, des éléments transuraniens furent découverts plus tard : le neptunium fut le premier, découvert par Edwin McMillan et Philip Abelson à Berkeley en 1939 [71].

Frédéric Joliot utilisa le caractère explosif de la fission pour séparer les nouveaux noyaux de l'uranium [72]. En effet la fission libère de l'énergie qui est communiquée, sous forme d'énergie cinétique, aux noyaux plus légers créés par fission. Les fragments peuvent s'échapper de la surface de l'uranium et il est possible de « recueillir ces atomes sur un support ». Il était même possible de suivre la trajectoire des atomes éjectés [73]. La fission du Thorium fut également étudiée, avec des résultats analogues.

Dans les noyaux lourds, l'excès relatif du nombre de neutrons sur le nombre de protons augmente rapidement avec la masse atomique. On pouvait donc s'attendre à ce que la fission dégage plusieurs neutrons par noyau d'uranium. C'est bien ce que montraient les expériences de Joliot [72,73], et aussi de Hahn et Straßmann [74] dans lesquelles les neutrons issus d'une source provoquaient la fission de l'uranium avec émission de neutrons supplémentaires. Toutefois, le nombre de neutrons qui sortaient de l'échantillon était supérieur à celui des neutrons créés par fission, de sorte que les réactions s'arrêtaient si on retirait la source de neutrons. Mais pour un échantillon assez gros, supérieur à une certaine « critique », la multiplication rapide du nombre de neutrons devait entraîner une réaction « en chaîne » [75-84] qui deviendrait normalement explosive, mais pourrait aussi être contrôlée et dégager de l'énergie de façon continue. « Des expériences récentes ont montré que les neutrons sont libérés dans la fission nucléaire de l'uranium induite par le bombardement lent de neutrons: on a observé des neutrons secondaires qui montrent des propriétés spatiales, énergétiques ou temporelles différentes de celles que possèdent ou peuvent acquérir les neutrons primaires » écrivaient Halban et al. [81]. L'analyse des phénomènes devait tenir compte des nombreuses réactions nucléaires impliquées, de la diffusion des neutrons dans la matière et de leur thermalisation en fonction de leur énergie, des neutrons rapides et retardés, des divers isomères nucléaires, etc. [85-87]. La complexité du problème a été reconnue ou du moins soupçonnée déjà à cette époque.

Frédéric Joliot avait déjà évoqué la possibilité d'une réaction nucléaire en chaîne avec une importante libération d'énergie lors de sa conférence Nobel en 1935. Avec ses collègues Hans von Halban, Lev Kowarski et Francis Perrin, il le démontra explicitement [88] en 1939. Ils plaçaient une source de neutrons au centre d'une sphère de cuivre (Cu) immergée dans un bain d'eau (qui ralentissait et dispersait les neutrons, augmentant ainsi le nombre d'événements de fission en raison de leur rétrodiffusion). La sphère était remplie d'oxyde d'uranium ( $U_3O_8$ ), ou d'eau, ou d'un mélange des deux, et on mesurait les flux de neutrons dans les différents cas. On observa dans cet assemblage dit sous-critique une augmentation importante du nombre de neutrons émis par la source initiale de neutrons au milieu de la sphère. Les auteurs purent même estimer, malgré leur connaissance limitée des diverses sections efficaces, que le nombre moyen de neutrons produits par fission était de  $3,5 \pm 0,7$ . Cette évaluation prenait en compte l'émission de neutrons par les produits de fission. La valeur précise est 2.41. Les auteurs conclurent qu'ils observaient une chaîne de réactions nucléaires. Si la taille de la zone

de réaction avait été plus grande et, par conséquent, qu'une plus petite fraction des neutrons produits se serait échappée de la surface de la sphère, le facteur de multiplication des neutrons aurait augmenté. Pour une certaine taille finie, il aurait explosé. Il y a donc une masse critique, que Francis Perrin estima en l'absence de réflecteur autour de la zone active [89].

Dans les expériences que nous venons de décrire, la réaction en chaîne nucléaire était déclenchée par l'arrivée de neutrons extérieurs. La fission peut-elle se produire autrement? La théorie de Bohr et Wheeler sur le processus de fission [90], basée sur le modèle de la «goutte de liquide», a prédit que le déclenchement peut résulter d'un quantum  $\gamma$ . En effet, la photofission de l'uranium et du thorium fut observée [91] en 1940 dans les Westinghouse Research Laboratories, en Pennsylvanie. De plus, Georgy Flyorov et Konstantin Petrzhak à Leningrad ont annoncé [92,93] qu'un noyau assez lourd peut fissionner spontanément, sans aucun déclenchement extérieur, libérant ainsi des neutrons.

En 1940, les grandes lignes des développements ultérieurs étaient désormais claires. Les modérateurs de neutrons à faible absorption et les réflecteurs, comme l'eau lourde (D<sub>2</sub>O) ou le graphite pur, s'ils sont placés autour de la zone de réaction, augmentent l'efficacité de la réaction. Les absorbeurs de neutrons, comme le cadmium, diminuent l'efficacité, et permettent ainsi de limiter la réaction à une intensité choisie. Ainsi, une réaction de fission en chaîne contrôlée n'a plus besoin d'une source de neutrons externe pour la maintenir en fonctionnement. Un tel dispositif critique fournit un facteur de multiplication "infini" pour l'intensité initiale des neutrons. On devait ainsi pouvoir obtenir des sources de neutrons considérablement améliorées par rapport aux faibles sources disponibles alors. On devait ainsi disposer d'outils utiles pour la recherche, permettant de produire des quantités beaucoup plus importantes d'éléments radioactifs artificiels, utilisables en médecine, en biologie et dans d'autres domaines. En raison de 200 MeV d'énergie libérée par un événement de fission, cela produirait une quantité d'énergie que l'on peut difficilement imaginer à l'avance. La liste des applications envisageables semblait illimitée. Cependant, des pas importants restaient à faire avant la réalisation pratique de ces projets.

Jusqu'en 1939, la science nucléaire avait fait l'objet d'une compétition internationale serrée en plusieurs langues (anglais, allemand, français, russe, parfois italien et autres). Elle était plutôt amicale, et de jeunes chercheurs passaient parfois d'un laboratoire à l'autre. Par exemple, Ettore Majorana travailla quelque temps en Allemagne avec Heisenberg, Bruno Pontecorvo en France avec Joliot-Curie. Deux événements allaient changer radicalement la situation. D'une part, l'extrême droite était devenue très puissante en Europe continentale et fut victorieuse au début de la Seconde Guerre mondiale, de sorte que de nombreux scientifiques italiens, allemands, autrichiens, danois et français avaient émigré vers les États-Unis d'Amérique (comme Fermi) ou au Royaume-Uni (comme Otto Frisch, alors que sa tante Lise Meitner, en juillet 1938, s'était réfugiée en Suède). D'un autre côté, la fission nucléaire et les réactions en chaîne donnaient à la physique nucléaire une importance militaire. En 1939, Francis Perrin [89] pouvait encore discuter de la masse critique d'un matériau radioactif (un sujet très nouveau!) dans les Comptes rendus de l'Académie des sciences. Dans les premiers jours de mai 1939, Joliot, Halban et Kowarski ont déposé des brevets sur la production d'électricité à partir d'une réaction en chaîne nucléaire ainsi que sur une explosion nucléaire. L'année suivante, ce sujet était devenu hautement confidentiel. Il fut traité en détail et quantitativement par l'Allemand Rudolf Peierls et l'Autrichien Otto Frisch dans un mémorandum écrit en anglais à l'usage du Gouvernement britannique.

#### 4. Conclusion

Dans la compétition amicale, mais serrée, entre scientifiques européens avant la Seconde Guerre mondiale, les Comptes rendus de l'Académie des sciences ont très rapidement fait connaître aux concurrents les dernières découvertes des scientifiques français, mais aussi leurs hésitations et leurs erreurs. Ce style de publication peut être comparé au mode actuel, qui implique un examen par les pairs, un processus souvent très long. Les deux styles ont un avantage. La publication rapide est responsable de la multiplication débridée des revues en ligne. La publication dans les Comptes rendus n'était pas complètement ouverte à tous. Chaque communication, quand l'auteur n'était pas un académicien, était présentée par un académicien, qui pouvait contrôler la qualité de la note. Ce contrôle était cependant plutôt lâche. Ce n'était pas un inconvénient grave à cette époque, car la proportion de scientifiques dans la population humaine était beaucoup plus faible qu'aujourd'hui (et la population humaine aussi plus petite). Actuellement, un contrôle attentif est généralement nécessaire, notamment pour assurer le caractère innovant des articles. Néanmoins, un système de publication décentralisé, permettant un contact plus direct entre l'auteur et l'éditeur, peut encore avoir un intérêt.

Des aperçus détaillés de la découverte du neutron et de la fission peuvent être trouvés dans les références [33,94]. À un niveau plus élémentaire, d'excellents exposés peuvent être trouvés sur Wikipedia:

[https://en.wikipedia.org/wiki/Discovery\\_of\\_the\\_neutron](https://en.wikipedia.org/wiki/Discovery_of_the_neutron)

[https://en.wikipedia.org/wiki/Nuclear\\_chain\\_reaction](https://en.wikipedia.org/wiki/Nuclear_chain_reaction)

[https://en.wikipedia.org/wiki/Spontaneous\\_fission#History](https://en.wikipedia.org/wiki/Spontaneous_fission#History)

#### Remerciements

Les auteurs remercient Hervé Nifenecker et Pierre Radvanyi pour leur lecture critique du manuscrit.
